# Supplementary material
Source: PubMed Central journal article supplement (PMC5736811)
Supplement: IAI.00381-17_zii001182249s1.pdf [file IAI.00381-17_zii001182249s1.pdf]

## **Supplemental Material**

Modulators of *Enterococcus faecalis* cell envelope integrity and antimicrobial resistance influence stable colonization of the mammalian gastrointestinal tract

Ismael L. Banla<sup>1,2</sup>, Sushma Kommineni<sup>2\*</sup>, Michael Hayward<sup>2</sup>, Marinelle Rodrigues<sup>3</sup>, Kelli L. Palmer<sup>3</sup>, Nita H. Salzman<sup>1,2#</sup> and Christopher J. Kristich<sup>1#</sup>

<sup>1</sup>Department of Microbiology and Immunology, <sup>2</sup>Pediatrics; Medical College of Wisconsin, Milwaukee WI; <sup>3</sup>Department of Biological Sciences, The University of Texas at Dallas

**Table S1**

**Figure S1-S7**

**Table S1** Bacterial strains and plasmids used in this work

| Strain or plasmid  | Genotype/description                                                                                                                                | Source                                  |
|--------------------|-----------------------------------------------------------------------------------------------------------------------------------------------------|-----------------------------------------|
| Strains            |                                                                                                                                                     |                                         |
| <i>E. coli</i>     |                                                                                                                                                     |                                         |
| DH5 $\alpha$       | <i>E. coli</i> host for routine cloning                                                                                                             | Laboratory stock                        |
| <i>E. faecalis</i> |                                                                                                                                                     |                                         |
| OG1                | Wild-type reference strain                                                                                                                          | (1)                                     |
| OG1RF              | Spontaneous Rif <sup>R</sup> , Fus <sup>R</sup> derivative of OG1 – primary wild type strain                                                        | (2)                                     |
| V583               | Vancomycin resistant <i>E. faecalis</i> clinical isolate (MDR strain)                                                                               | (3)                                     |
| CK119              | OG1RF $\Delta ireK$                                                                                                                                 | (4)                                     |
| CK125              | OG1RF $\Delta ireP \Delta ireK$                                                                                                                     | (5)                                     |
| CK206              | V583 $\Delta ireK$                                                                                                                                  | This work                               |
| 23J13              | OG1RF <i>brp/Blh::MarTN</i>                                                                                                                         | (6)                                     |
| 28M17              | OG1RF <i>ispA::MarTN</i>                                                                                                                            | (6)                                     |
| 35H2               | OG1RF <i>sigV::MarTN</i>                                                                                                                            | (6)                                     |
| SB6                | OG1RF $\Delta croR \text{ } croS$                                                                                                                   | S. Kellogg and C. Kristich, unpublished |
| $\Delta ireK^*$    | CK119 suppressor mutant                                                                                                                             | This work                               |
| IB21               | CK119 $\Delta 271$                                                                                                                                  | This work                               |
| IB22               | CK119 $\Delta 272$                                                                                                                                  | This work                               |
| IB23               | CK119 $\Delta 271-272$                                                                                                                              | This work                               |
| IB25               | CK119 $\Delta 270$                                                                                                                                  | This work                               |
| CK164              | OG1RF $\Delta ireB$                                                                                                                                 | (7)                                     |
| CK121              | OG1RF $\Delta ireP$                                                                                                                                 | (5)                                     |
| IB18               | OG1RF $\Delta 271$                                                                                                                                  | This work                               |
| IB19               | OG1RF $\Delta 272$                                                                                                                                  | This work                               |
| IB20               | OG1RF $\Delta 271-272$                                                                                                                              | This work                               |
| BL102              | OG1 <i>ireK K41R</i>                                                                                                                                | (8)                                     |
| IB36               | BL102 $\Delta 271-272$                                                                                                                              | This work                               |
| Plasmids           |                                                                                                                                                     |                                         |
| pJRG8              | Expression vector with constitutive promoter (Erythromycin resistance)                                                                              | (5)                                     |
| pJRG9              | Expression vector with constitutive promoter (chloramphenicol resistance)                                                                           | (9)                                     |
| pJH082             | <i>E. faecalis</i> allelic exchange vector (chloramphenicol resistance, <i>LacZ</i> , <i>repA V71G</i> , <i>thyA</i> <sup>*</sup> counterselection) | This work                               |
| pJH086             | <i>E. faecalis</i> allelic exchange vector (chloramphenicol resistance, <i>LacZ</i> , <i>repA V71G</i> , <i>pheS</i> <sup>*</sup> counterselection) | (10)                                    |
| pCJK74             | <i>ireK</i> deletion plasmid                                                                                                                        | (4)                                     |

|         |                                                                                        |           |
|---------|----------------------------------------------------------------------------------------|-----------|
| pCJK160 | pJRG8:: <i>ireP-ireK</i>                                                               | (5)       |
| pCJK205 | Constitutive expression of <i>lacZ</i><br>(erythromycin resistance)                    | (11)      |
| pCJK216 | pJRG8:: <i>ireP-ireK</i>                                                               | (5)       |
| pIB11   | 271 in pJRG9                                                                           | This work |
| pIB12   | 272 in pJRG9                                                                           | This work |
| pIB13   | 271-272 in pJRG9                                                                       | This work |
| pIB14   | 876 in pJRG9                                                                           | This work |
| pIB28   | 270 in pJRG9                                                                           | This work |
| pIB10   | $\Delta$ 271 deletion allele in pJH082 (271<br>$\Delta$ K6-L412, 97% deletion)         | This work |
| pIB15   | $\Delta$ 272 deletion allele in pJH082 (272<br>$\Delta$ F2-A175, 92% deletion)         | This work |
| pIB16   | $\Delta$ 271-272 deletion allele in pJH082<br>(271 $\Delta$ K6-272 A175, 94% deletion) | This work |
| pIB18   | $\Delta$ 270 deletion allele in pJH086 (270<br>$\Delta$ K2-L343, 99% deletion)         | This work |

1. **Gold OG, Jordan HV, van Houte J.** The prevalence of enterococci in the human mouth and their pathogenicity in animal models. *Archives of Oral Biology* **20**:IN15-477.
2. **Dunny GM, Brown BL, Clewell DB.** 1978. Induced cell aggregation and mating in *Streptococcus faecalis*: evidence for a bacterial sex pheromone. *Proceedings of the National Academy of Sciences* **75**:3479-3483.
3. **Sahm DF, Kissinger J, Gilmore MS, Murray PR, Mulder R, Solliday J, Clarke B.** 1989. In vitro susceptibility studies of vancomycin-resistant *Enterococcus faecalis*. *Antimicrobial Agents and Chemotherapy* **33**:1588-1591.
4. **Kristich CJ, Wells CL, Dunny GM.** 2007. A eukaryotic-type Ser/Thr kinase in *Enterococcus faecalis* mediates antimicrobial resistance and intestinal persistence. *Proc Natl Acad Sci U S A* **104**:3508-3513.
5. **Kristich CJ, Little JL, Hall CL, Hoff JS.** 2011. Reciprocal regulation of cephalosporin resistance in *Enterococcus faecalis*. *MBio* **2**:e00199-00111.

6. **Kristich CJ, Nguyen VT, Le T, Barnes AMT, Grindle S, Dunny GM.** 2008. Development and Use of an Efficient System for Random *mariner* Transposon Mutagenesis To Identify Novel Genetic Determinants of Biofilm Formation in the Core *Enterococcus faecalis* Genome. *Applied and Environmental Microbiology* **74**:3377-3386.
7. **Hall CL, Tschannen M, Worthey EA, Kristich CJ.** 2013. IreB, a Ser/Thr Kinase Substrate, Influences Antimicrobial Resistance in *Enterococcus faecalis*. *Antimicrobial Agents and Chemotherapy* **57**:6179-6186.
8. **Labbe BD, Kristich CJ.** 2017. Growth- and stress-induced PASTA kinase phosphorylation in *Enterococcus faecalis*. *Journal of Bacteriology*.
9. **Snyder H, Kellogg SL, Skarda LM, Little JL, Kristich CJ.** 2014. Nutritional Control of Antibiotic Resistance via an Interface between the Phosphotransferase System and a Two-Component Signaling System. *Antimicrobial Agents and Chemotherapy* **58**:957-965.
10. **Kellogg SL, Little JL, Hoff JS, Kristich CJ.** 2017. Requirement of the CroRS Two-Component System for Resistance to Cell Wall-Targeting Antimicrobials in *Enterococcus faecium*. *Antimicrob Agents Chemother* **61**.
11. **Djoric D, Kristich CJ.** 2015. Oxidative stress enhances cephalosporin resistance of *Enterococcus faecalis* through activation of a two-component signaling system. *Antimicrob Agents Chemother* **59**:159-169.

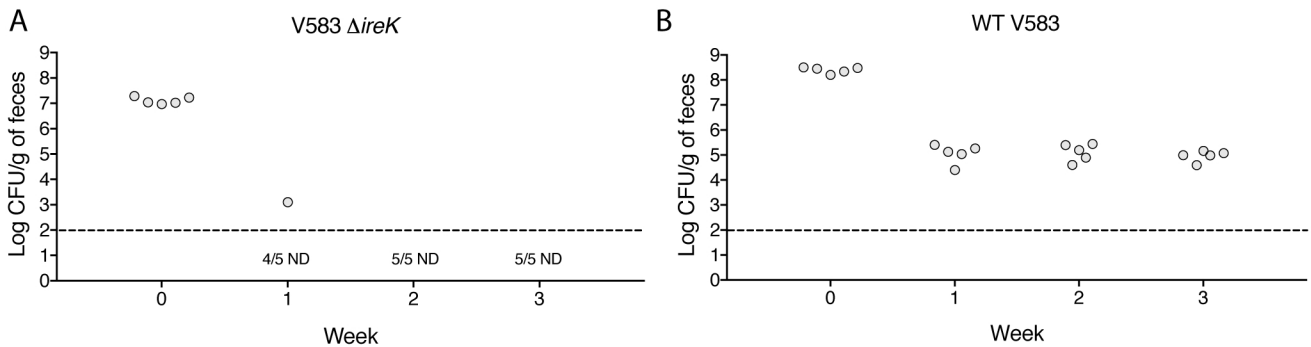

**Supplemental figure 1. Deletion of *ireK* in *E. faecalis* V583 impairs intestinal colonization.**

Intestinal colonizations of MDR *E. faecalis* strain (V583) and corresponding  $\Delta ireK$  mutant (CK206) were assessed. Groups of mice (5 per group) were colonized with *E. faecalis* V583 (panel B) or the corresponding  $\Delta ireK$  mutant (CK206; panel A). Bacterial loads were determined by enumerating the enterococcal strains in feces by culture on kanamycin-supplemented BHI agar. Dotted line represents the limit of detection. Symbols for mice with undetectable colonization levels were omitted, and instead the number of mice for which colonization was not detected (ND) is shown underneath the dotted line.

A

*ΔireP ΔireK* (pJRG8::*ireP-ireK* K41R)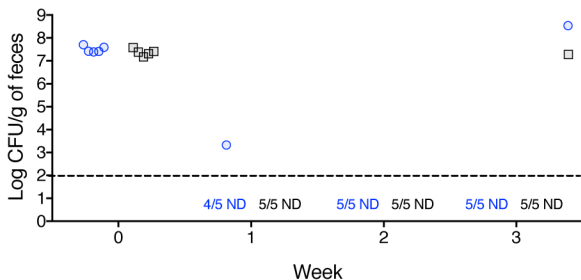

B

*ΔireP ΔireK* (pJRG8::*ireP-ireK*)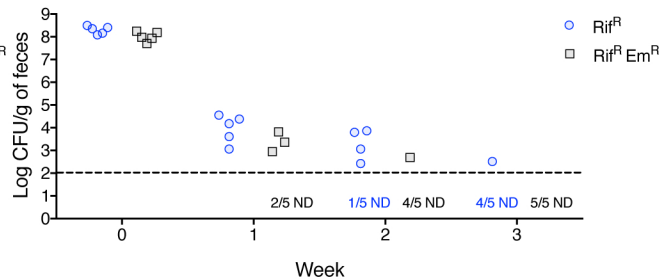

**Supplemental figure 2. Ectopic expression of WT IreK enhances GIT colonization.** Mice (5 per group) were fed with *ΔireP ΔireK* double mutant (CK125) carrying a plasmid encoding either *IreP* and *IreK*-K41R (pCJK216) (A) or WT *IreP* and *IreK* in tandem (pCJK160) (B). Colonization levels in the feces were determined by enumerating Rif-resistant clones. Plasmid retention was assessed by enumerating Rif and Erythromycin (Em)-resistant clones. Dotted line represents the limit of detection. Symbols for mice with undetectable colonization level were omitted, and instead the number of mice for which colonization was not detected (ND) is shown underneath the dotted line.

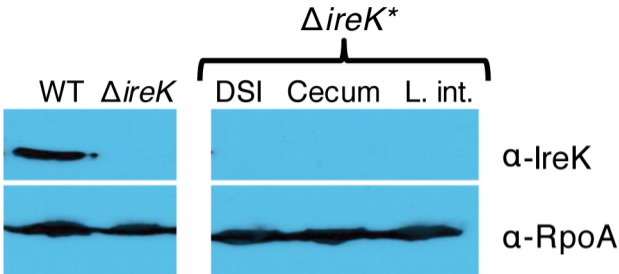

**Supplemental figure 3.  $\Delta ireK^*$  clones lack IreK.** Expression of IreK in WT *E. faecalis* (OG1RF),  $\Delta ireK$  (CK119) and  $\Delta ireK^*$  was assessed by Western blot analysis probing for IreK and RpoA (loading control).  $\Delta ireK^*$  samples originate from clones obtained from the distal small intestine (DSI), cecum and large intestine (L. int.) of the mouse in Figure 3.

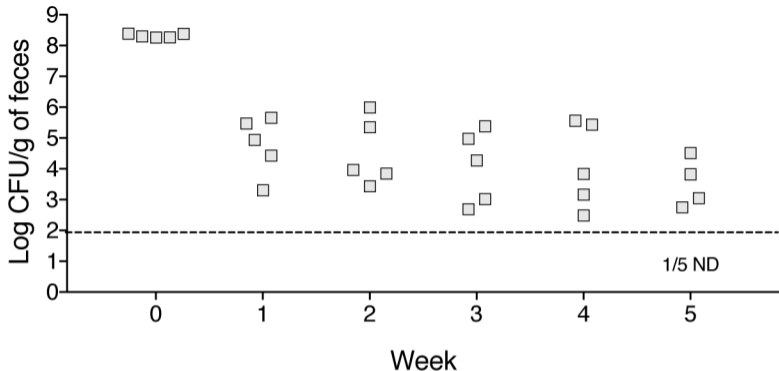

**Supplemental figure 4. Deletion of 271 and 272 in  $\Delta ireK$  background restores GIT colonization.** 5 mice were colonized with the  $\Delta ireK \Delta 271-272$  (IB23) triple mutant and colonization was assessed by enumerating fecal viable counts on rifampin-supplemented BHI agar. Dotted line represents the limit of detection.



| Strain                                             | Cholate MIC (mM) | Lysozyme MIC (mg/ml) |
|----------------------------------------------------|------------------|----------------------|
| WT (pJRG9)                                         | 256              | 32                   |
| $\Delta ireK$ (pJRG9)                              | 32               | 4                    |
| $\Delta ireK \Delta 270$ (pJRG9)                   | 256              | 16                   |
| $\Delta ireK \Delta 270$ (pJRG9:: <i>270</i> )     | 256              | 8                    |
| $\Delta ireK \Delta 270$ (pJRG9:: <i>271-272</i> ) | 32               | 4                    |

**Supplemental figure 5. 270 does not modulate antimicrobial resistance in *E. faecalis*.** Cholate and lysozyme resistance was determined for WT *E. faecalis* (OG1RF),  $\Delta ireK$  (CK119), and  $\Delta ireK \Delta 270$  (IB25) carrying the empty vector pJRG9 or expressing wild-type copies of the indicated genes. Reported MICs represent the median value from three independent biological replicates.

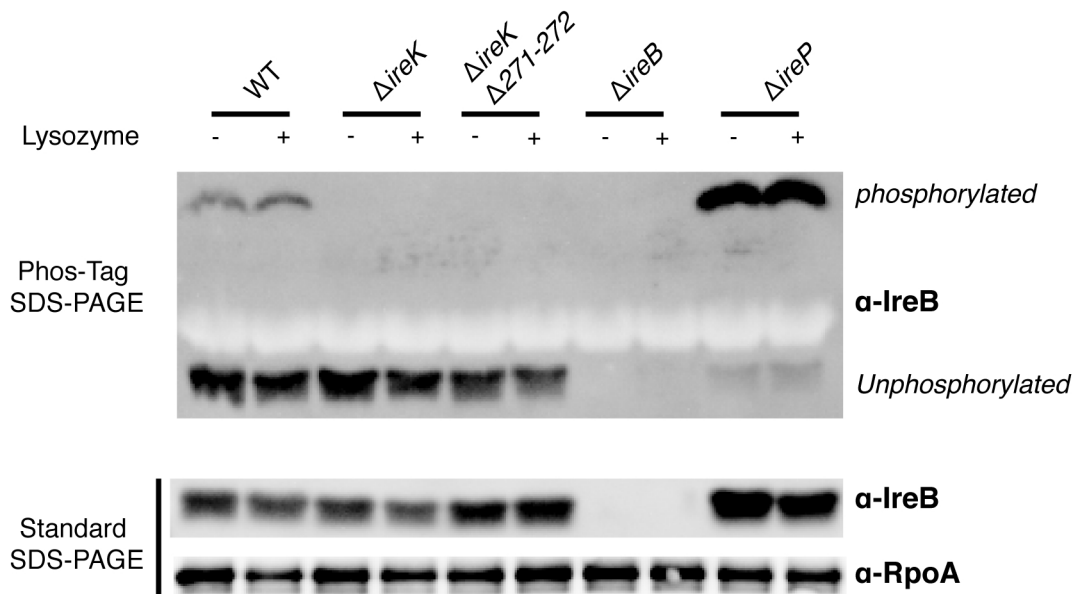

**Supplemental figure 6. 271 and 272 do not alter expression and phosphorylation of IreB in  $\Delta ireK$  background.** Western blots of Phos-tag SDS-PAGE (top) and standard SDS Page gels (bottom) probing for IreB and RpoA (loading control) in WT (OG1RF),  $\Delta ireK$  (CK119),  $\Delta ireK \Delta 271-272$  (IB23),  $\Delta ireB$  (CK164), and  $\Delta ireP$  (CK121). Lysates of exponential phase bacteria that were lysozyme or mock-treated were analyzed.

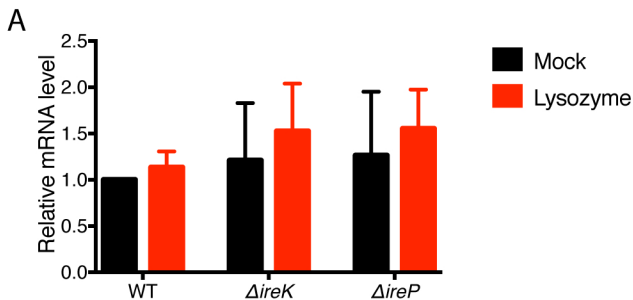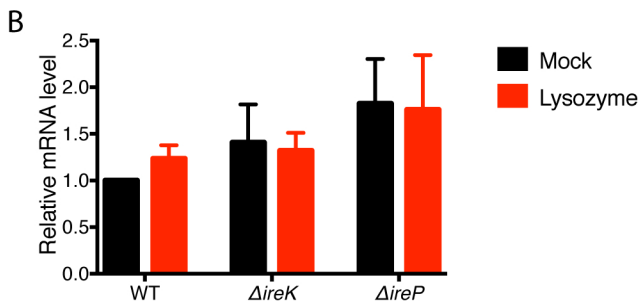

**Supplemental figure 7. IreK does not affect mRNA levels of 271 and 272.** mRNA from lysozyme and mock-treated cells was isolated and levels of 271 (A) and 272 (B) were quantified by qRT-PCR. Relative mRNA expression was determined following the Pfaffl method using *gyrB* as the reference gene. Samples were obtained WT *E. faecalis* (OG1RF),  $\Delta ireK$  (CK119) and  $\Delta ireP$  (CK121) mutants. Samples for each strain were from three independent biological replicates, each independent culture was examined with three technical replicates and error bars represent standard deviations.
